# Supplementary material for: Cloning and Expression Analysis of Seven VvGA2ox Genes in Ovule Development of Seeded and Seedless Grapes (Vitis vinifera)
Source: Research Square preprint supplement (doi:10.21203/rs.3.rs-1667666/v1), 2022-05-23
Supplement: Supplementary file 1 [file f8e0e79c05fcce0b4e7d0c82.docx]

**Table S3** The gene id of GAoxs used in this study.

| **Name** | **Species** | **Gene ID** | **Amino acid** |
| --- | --- | --- | --- |
| AtGA2ox1 | *Arabidopsis thaliana* | AT1G78440 | 329 |
| AtGA2ox2 | *Arabidopsis thaliana* | AT1G30040 | 341 |
| AtGA2ox3 | *Arabidopsis thaliana* | AT2G34555 | 335 |
| AtGA2ox4 | *Arabidopsis thaliana* | AT1G47990 | 321 |
| AtGA2ox6 | *Arabidopsis thaliana* | AT1G02400 | 329 |
| AtGA2ox7 | *Arabidopsis thaliana* | AT1G50960 | 336 |
| AtGA2ox8 | *Arabidopsis thaliana* | AT4G21200 | 338 |
| AtGA2ox9 | *Arabidopsis thaliana* | AT5G58660 | 352 |
| AtGA2ox10 | *Arabidopsis thaliana* | AT3G47190 | 331 |
| PpGA2ox1 | *Prunus persica* | Prupe.1G111900 | 337 |
| PpGA2ox2 | *Prunus persica* | Prupe.1G344000 | 344 |
| PpGA2ox3 | *Prunus persica* | Prupe.3G006700 | 351 |
| PpGA2ox4 | *Prunus persica* | Prupe.4G026300 | 348 |
| PpGA2ox5 | *Prunus persica* | Prupe.4G080700 | 341 |
| PpGA2ox6 | *Prunus persica* | Prupe.4G150200 | 333 |
| PpGA2ox7 | *Prunus persica* | Prupe.4G204600 | 328 |
| PpGA2ox8 | *Prunus persica* | Prupe.6G055300 | 334 |
| ZmGA2ox1 | *Zea mays L.* | Zm00001d037565 | 366 |
| ZmGA2ox1-2 | *Zea mays L.* | Zm00001d024175 | 370 |
| ZmGA2ox2 | *Zea mays L.* | Zm00001d040737 | 349 |
| ZmGA2ox3 | *Zea mays L.* | Zm00001d043411 | 331 |
| ZmGA2ox3-2 | *Zea mays L.* | Zm00001d012712 | 338 |
| ZmGA2ox4 | *Zea mays L.* | Zm00001d038695 | 340 |
| ZmGA2ox5 | *Zea mays L.* | Zm00001d018617 | 354 |
| ZmGA2ox6 | *Zea mays L.* | Zm00001d002999 | 362 |
| ZmGA2ox7 | *Zea mays L.* | Zm00001d039394 | 331 |
| ZmGA2ox7-2 | *Zea mays L* | Zm00001d008909 | 336 |
| ZmGA2ox8 | *Zea mays L.* | Zm00001d038996 | 373 |
| ZmGA2ox9 | *Zea mays L.* | Zm00001d017294 | 361 |
| ZmGA2ox10 | *Zea mays L.* | Zm00001d037724 | 333 |
| VvGA2ox3a | *Vitis vinifera* | VIT_10s0003g03490 | 275 |
| VvGA2ox3b | *Vitis vinifera* | VIT_19s0140g00120 | 323 |
| VvGA2ox3c | *Vitis vinifera* | VIT_19s0140g00140 | 332 |
| VvGA2ox4 | *Vitis vinifera* | VIT_05s0077g00520 | 399 |
| VvGA2ox6 | *Vitis vinifera* | VIT_07s0005g01920 | 333 |
| VvGA2ox7 | *Vitis vinifera* | VIT_01s0010g01650 | 340 |
| VvGA2ox8a | *Vitis vinifera* | VIT_10s0116g00410 | 344 |
| VvGA2ox8b | *Vitis vinifera* | VIT_19S0177G0002 | 223 |
| VvGA2ox8c | *Vitis vinifera* | VIT_19s0177g00030 | 367 |
| VvGA2ox10 | *Vitis vinifera* | VIT_06s0004g06790 | 337 |
| VvGA2ox11 | *Vitis vinifera* | VIT_03s0017g00620 | 352 |
| VvGA2ox12 | *Vitis vinifera* | VIT_03s0063g01150 | 342 |
| VvGA2ox13 | *Vitis vinifera* | VIT_03s0063g01260 | 342 |
